# Supplementary material for: Long non-coding (lnc)RNA PAPAS overexpression inhibits tumor growth in papillary thyroid carcinoma by downregulating lncRNA HOTTIP
Source: PubMed Central journal article supplement — Oncol Lett. 2020 Jan 21;19(3):2281–5. doi: 10.3892/ol.2020.11323 (PMC7039133; doi:10.3892/ol.2020.11323), 2020-01-21

Figure S1. Expression levels of PAPAS and HOTTIP in IHH-4, HTH-83 and Nthy-ori 3-1 cell lines. Expression levels of PAPAS and HOTTIP in IHH-4, HTH-83 and Nthy-ori 3-1 cell lines were measured by reverse transcription-quantitative PCR. Compared with Nthy-ori 3-1 cells, (A) PAPAS was downregulated and (B) HOTTIP was upregulated in IHH-4 and HTH-83 cells. \*P<0.05. PAPAS, pre-ribosomal RNA antisense transcripts; HOTTIP, HOXA transcript at the distal tip.

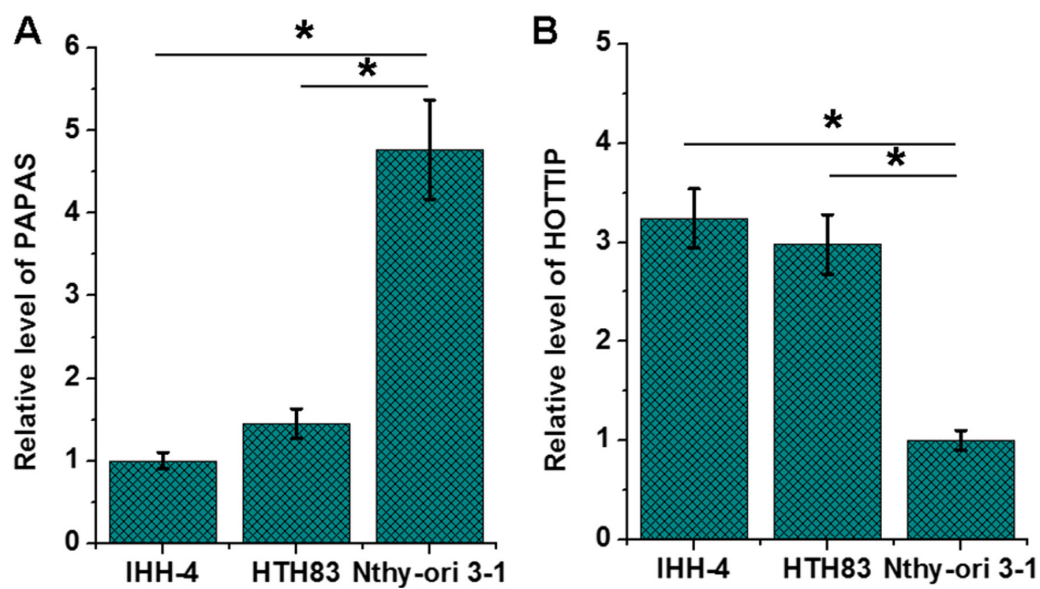

Figure S2. HOTTIP knockdown does not affect PAPAS. (A) HOTTIP siRNA-mediated silencing was achieved in both IHH-4 and HTH-83 cells. (B) Compared with C and NC groups, HOTTIP siRNA did not significantly affect the expression level of PAPAS in IHH-4 and HTH-83 cells. \* $P < 0.05$ . HOTTIP, HOXA transcript at the distal tip; siRNA, small interfering RNA; PAPAS, pre-ribosomal RNA antisense transcripts; C, untransfected control; NC, negative control.

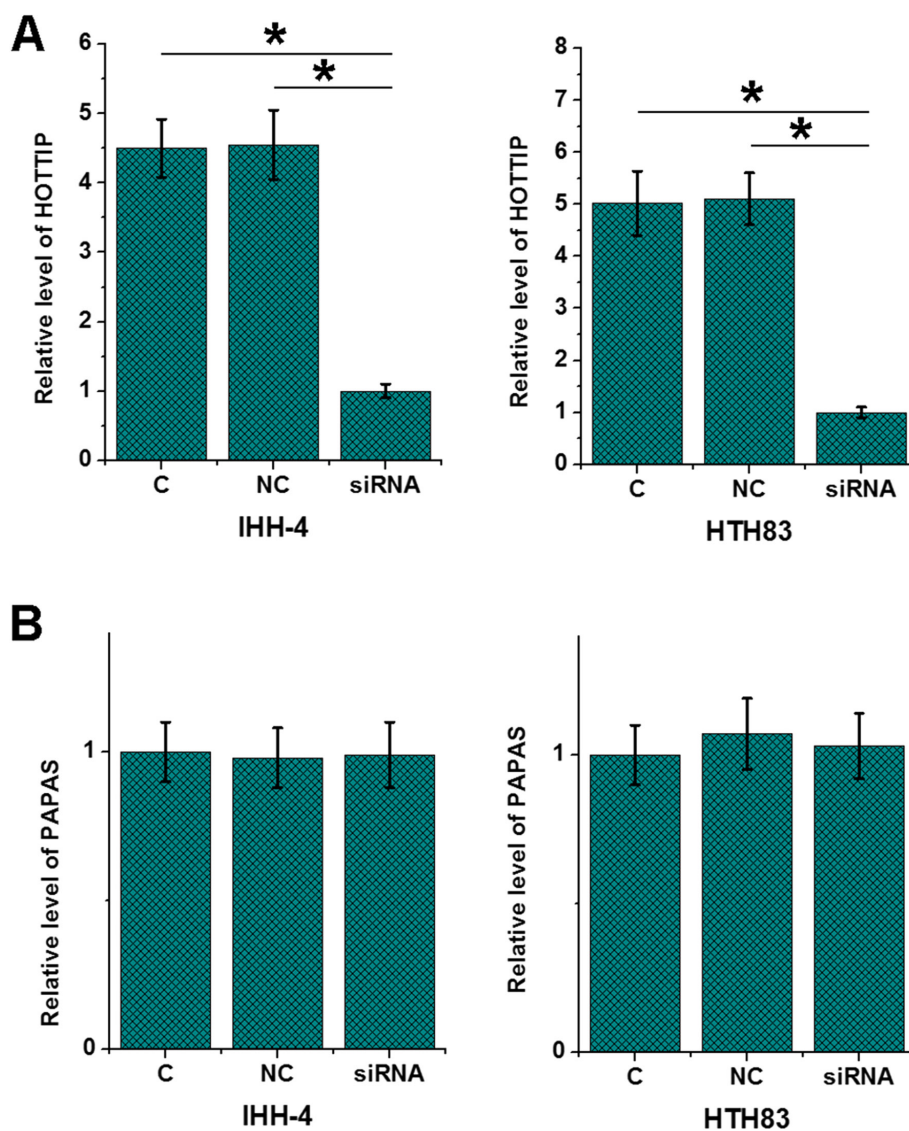

Supplement: Supplementary_Data.pdf [file Supplementary_Data.pdf]
